# Supplementary material for: Removal of Grit from Baby Leafy Salad Vegetables by Combinations of Sanitiser and Surfactant
Source: Hindawi journal article supplement (doi:10.1155/2019/6209806), 2019-08-04
Supplement: f1 [file 6209806.f1.doc]

**SUPPLEMENTARY DATA**

**Table S1:** Turbidity values of wash solutions used in experiment 2

| **Wash solution** | **Turbidity (NTU)** | **Turbidity (NTU)** *(after wash)* |
| --- | --- | --- |
| Tap water | 1.31 | 78.8 |
| PAA (40 mgL-1) | 0.79 | 75.78 |
| Tsunami 100 (40 mgL-1) + 0.05% SDS | 89.9 | 194.8 |

**Table S2**: Colour *L*, a*, b** parameters of baby spinach leaves treated with tap water (control), peroxyacetic acid (PAA), or peroxyacetic acid + sodium dodecyl sulfate (PAA+ SDS), during storage at 4 °C for 14 d (*each value is a mean of 15 replicates*)

| **Treatment** | **Storage days** | ***L**** | ***a**** | ***b**** |
| --- | --- | --- | --- | --- |
| **control** | 0 | 39.60667 | -14.9967 | 21.597 |
| 4 | 39.15533 | -14.904 | 20.11533 |
| 7 | 39.41933 | -15.299 | 21.20867 |
| 10 | 39.555 | -15.0363 | 21.12133 |
| 14 | 39.697 | -15.0717 | 21.102 |
| **PAA** | 0 | 39.33167 | -14.9527 | 20.794 |
| 4 | 38.42367 | -14.6333 | 19.99467 |
| 7 | 38.46633 | -14.567 | 19.716 |
| 10 | 39.661 | -15.024 | 20.23767 |
| 14 | 39.551 | -14.6713 | 20.612 |
| **PAA + SDS** | 0 | 38.71833 | -14.5053 | 19.781 |
| 4 | 38.735 | -14.3567 | 19.77067 |
| 7 | 39.59567 | -15.0157 | 20.9293 |
| 10 | 39.814 | -15.3203 | 21.17767 |
| 14 | 40.14167 | -15.3417 | 21.05367 |

**Table S3**: Electrolyte leakage values for baby spinach leaves treated with tap water (control), peroxyacetic acid (PAA), or peroxyacetic acid + sodium dodecyl sulfate (PAA+ SDS), during storage at 4 °C for 14 d (5 *replicates per treatment on each sampling day*)

|  | **Day of storage** | | | | |
| --- | --- | --- | --- | --- | --- |
| **Treatment** | 0 | 4 | 7 | 10 | 14 |
|  | 3.46 | 5.52 | 5.34 | 4.34 | 4.66 |
|  | 3 | 4.86 | 5.84 | 4.65 | 5.52 |
| **Control** | 4.34 | 4.52 | 5.22 | 5.13 | 4.22 |
|  | 6.2 | 5.66 | 4.53 | 4.52 | 5.09 |
|  | 5.64 | 4.89 | 5.92 | 4.89 | 6.05 |
|  | 4.94 | 5.73 | 4.31 | 4.05 | 6.61 |
|  | 4.77 | 4.98 | 6.36 | 5.28 | 4.53 |
| **PAA** | 4.66 | 6.37 | 4.78 | 3.95 | 5.41 |
|  | 3.83 | 4.62 | 5.71 | 5 | 6.55 |
|  | 4.22 | 5.06 | 5.94 | 5.1 | 5.66 |
|  | 3.8 | 4.98 | 5.46 | 5.17 | 6.51 |
|  | 3.13 | 4.24 | 4.44 | 4.83 | 5.45 |
| **PAA + SDS** | 3.14 | 5.59 | 4.92 | 4.25 | 5.33 |
|  | 3.87 | 4.56 | 4.69 | 5.2 | 6.32 |
|  | 3.89 | 5.6 | 5.1 | 5.43 | 6.51 |
